# Supplementary material for: Timing- and Dose-Specific Associations of Prenatal Smoke Exposure With Newborn DNA Methylation
Source: PubMed Central journal article supplement — Nicotine Tob Res. 2020 Apr 24;22(10):1917–22. doi: 10.1093/ntr/ntaa069 (PMC7542646; doi:10.1093/ntr/ntaa069), 2020-04-24
Supplement: ntaa069_suppl_supplementary_figure_1.pdf [file ntaa069_suppl_supplementary_figure_1.pdf]

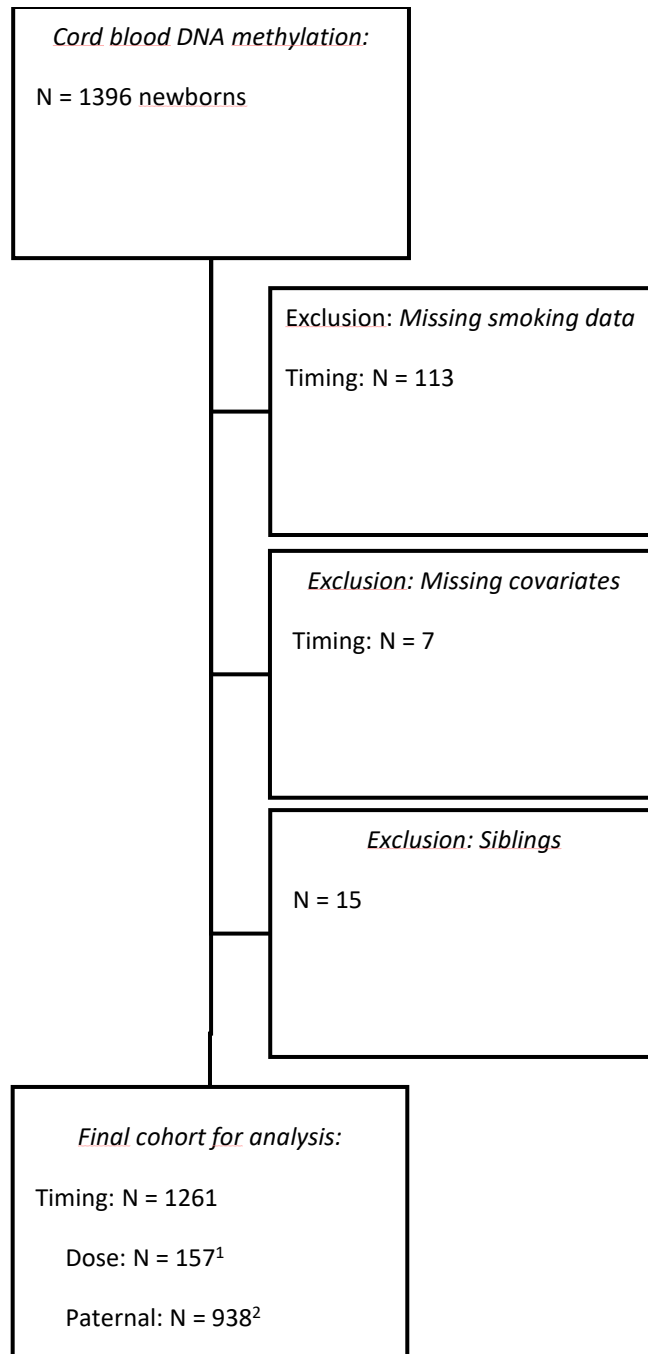

### Supplementary figure 1 Flow chart of the study population

1: Third-trimester-dose among sustained smoking mothers. The trend analysis was performed among N=1,260 newborns with nonsmoking mothers as reference.

2: One father-newborn pair was excluded from the analysis on paternal smoking because it was unknown if the father was the biological father of his child. Sensitivity analysis among all newborns: N=1,221.
