# Supplementary material for: Timing- and Dose-Specific Associations of Prenatal Smoke Exposure With Newborn DNA Methylation
Source: PubMed Central journal article supplement — Nicotine Tob Res. 2020 Apr 24;22(10):1917–22. doi: 10.1093/ntr/ntaa069 (PMC7542646; doi:10.1093/ntr/ntaa069), 2020-04-24
Supplement: ntaa069_suppl_supplementary_figure_3.pdf [file ntaa069_suppl_supplementary_figure_3.pdf]

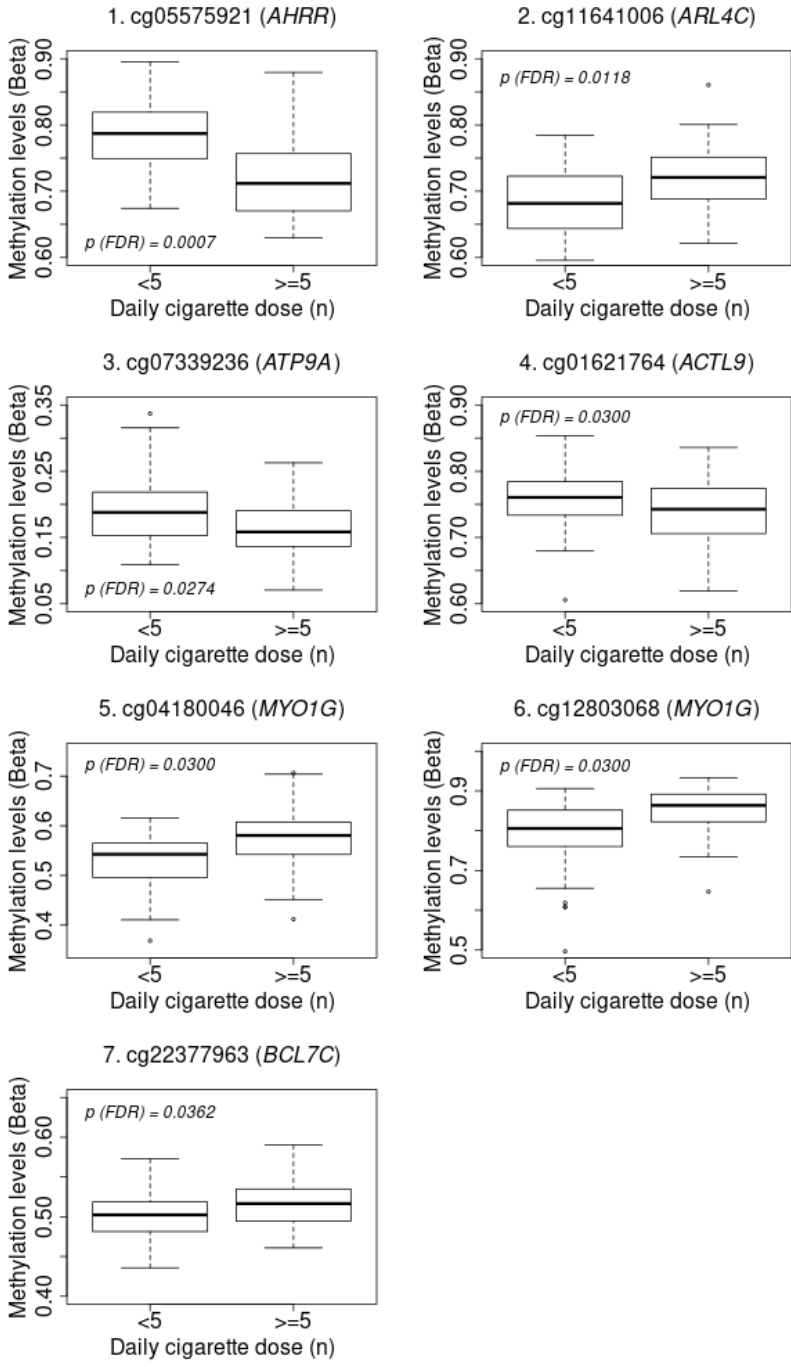

**Supplementary figure 3 DNA methylation levels in cord blood at the seven CpGs associated with maternal smoking dose.**

Analysis among sustained smoking mothers only. DNA methylation levels are shown for newborns of mothers who smoked 1-4 cigarettes per day and of those smoking 5 or more cigarettes per day in the 3<sup>rd</sup> trimester.
